# Supplementary material for: Fungal-Mediated Biotransformation of the Plant Growth Regulator Forchlorfenuron by Cunninghamella elegans
Source: MDPI journal article supplement (doi:10.3390/metabo14020101), 2024-02-01
Supplement: s1 [file s1]

Supplementary Materials

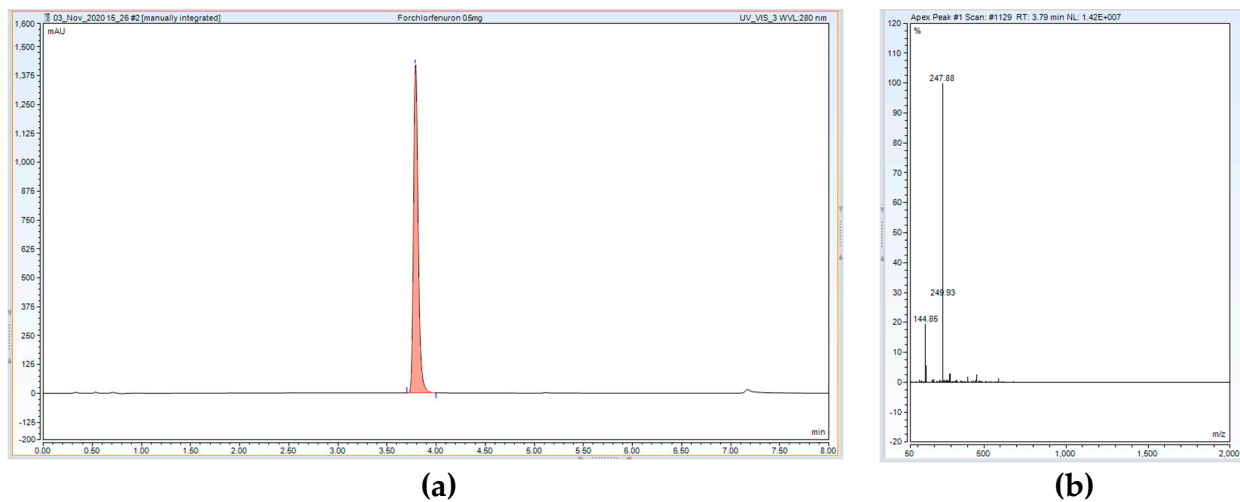

**Figure S1.** HPLC chromatogram and HR-MS spectra for pure forchlorfenuron.

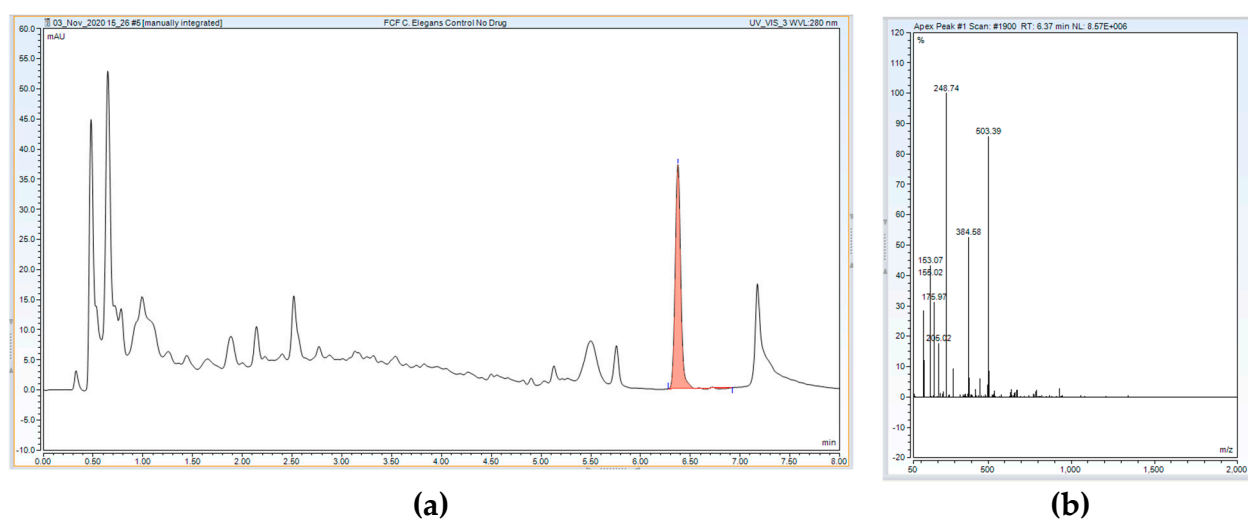

**Figure S2.** HPLC chromatogram and HR-MS spectra for *C. elegans* control.

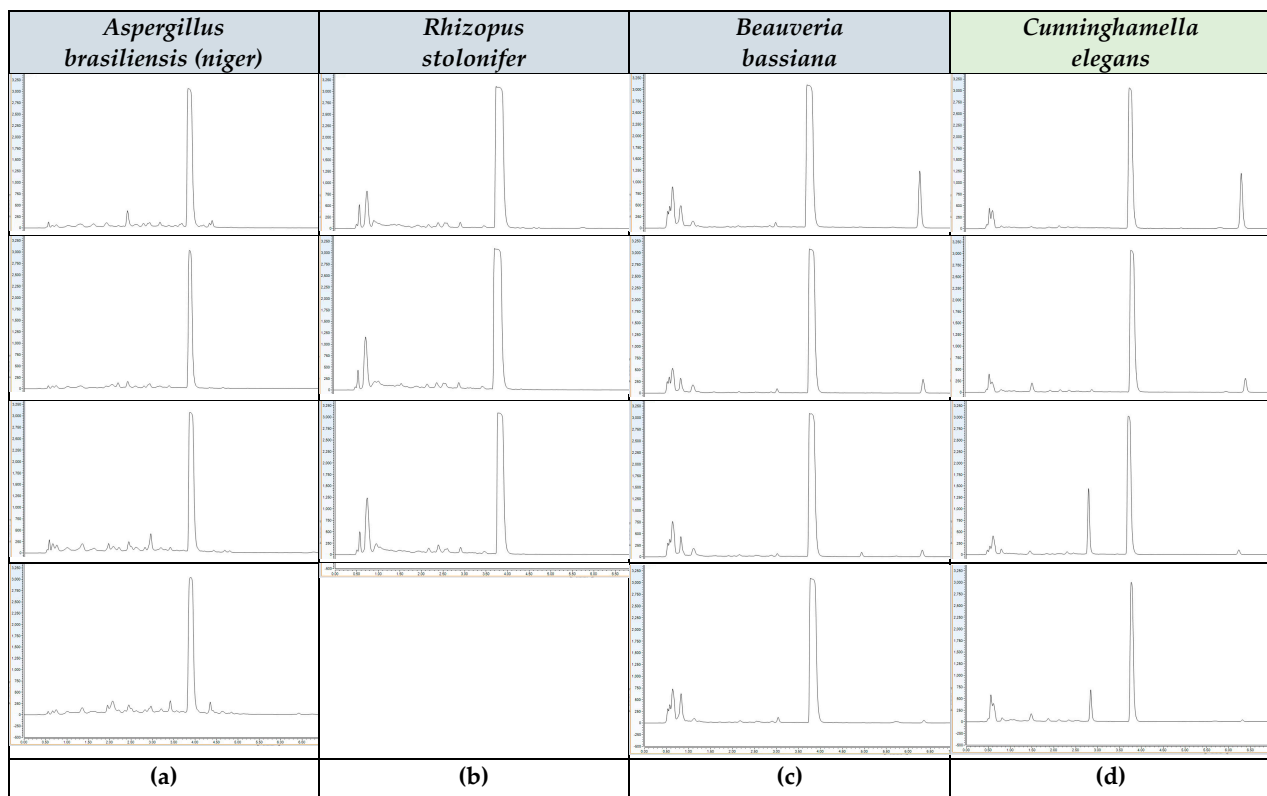

**Figure S3.** High-performance liquid chromatography (HPLC) chromatograms reporting biotransformation of FCF by fungal strains. High-performance liquid chromatography (HPLC) chromatograms reporting biotransformation of FCF by (a) *Aspergillus brasiliensis (niger)* at 5 days (1), 7 days (2), 10 days (3), and 14 days (4); (b) *Rhizopus stolonifer* at 3 days (1), 6 days (2), and 9 days (3); (c) *Beauveria bassiana* at 9 days (1), 15 days (2), 26 days (3), and 30 days (4); (d) *Cunninghamella elegans* at 9 days (1), 15 days (2), 26 days (3), and 30 days (4).

**Table S1.** Percent Change in Biotransformation Time Following Optimization.

The percent change in biotransformation time was calculated according to the following percent change equation:

$$= \frac{(X2 - X1)}{|X1|} * 100$$

| Optimization Method                                                   | Time to Conversion (days) | Percent Change                     |
|-----------------------------------------------------------------------|---------------------------|------------------------------------|
| Standard Conditions                                                   | 26                        |                                    |
| Solid Support System                                                  | 21                        | 19.23% decrease <sup>1</sup>       |
| Media Screening                                                       | 14                        | 33.33% decrease <sup>2</sup>       |
| Inoculation with Fungal Mass                                          | 7                         | 50.00% decrease <sup>3</sup>       |
| <b>Overall Percent Change in Reaction Time Following Optimization</b> |                           | <b>73.08% decrease<sup>4</sup></b> |

<sup>1</sup> = ((21-26)/|26|)\*100; <sup>2</sup> = ((14-21)/|21|)\*100; <sup>3</sup> = ((7-14)/|14|)\*100; <sup>4</sup> = ((7-26)/|26|)\*100

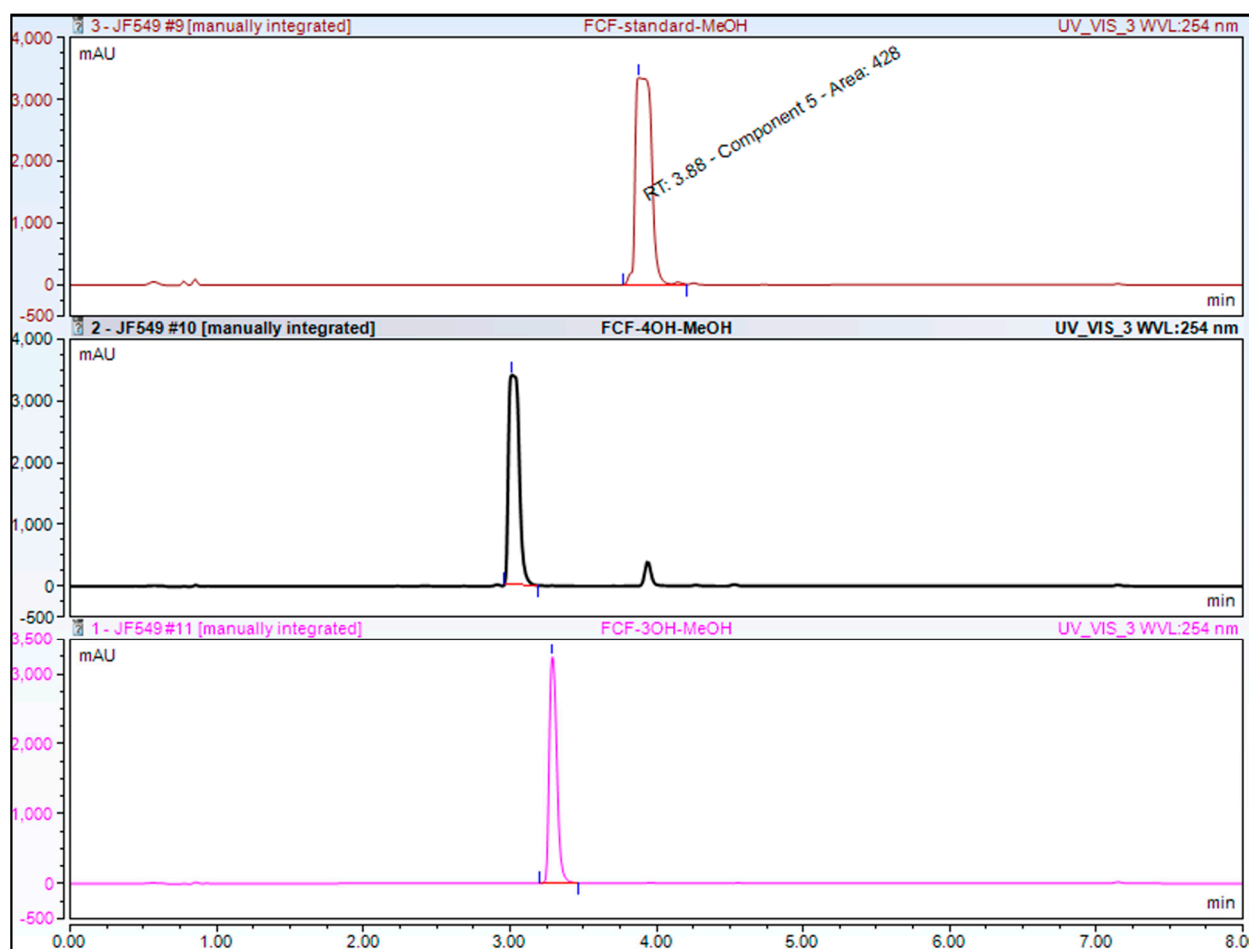

**Figure S4.** HPLC chromatogram of pure forchlorfenuron, 4-hydroxyphenyl-forchlorfenuron, and 3-hydroxyphenyl-forchlorfenuron overlay.

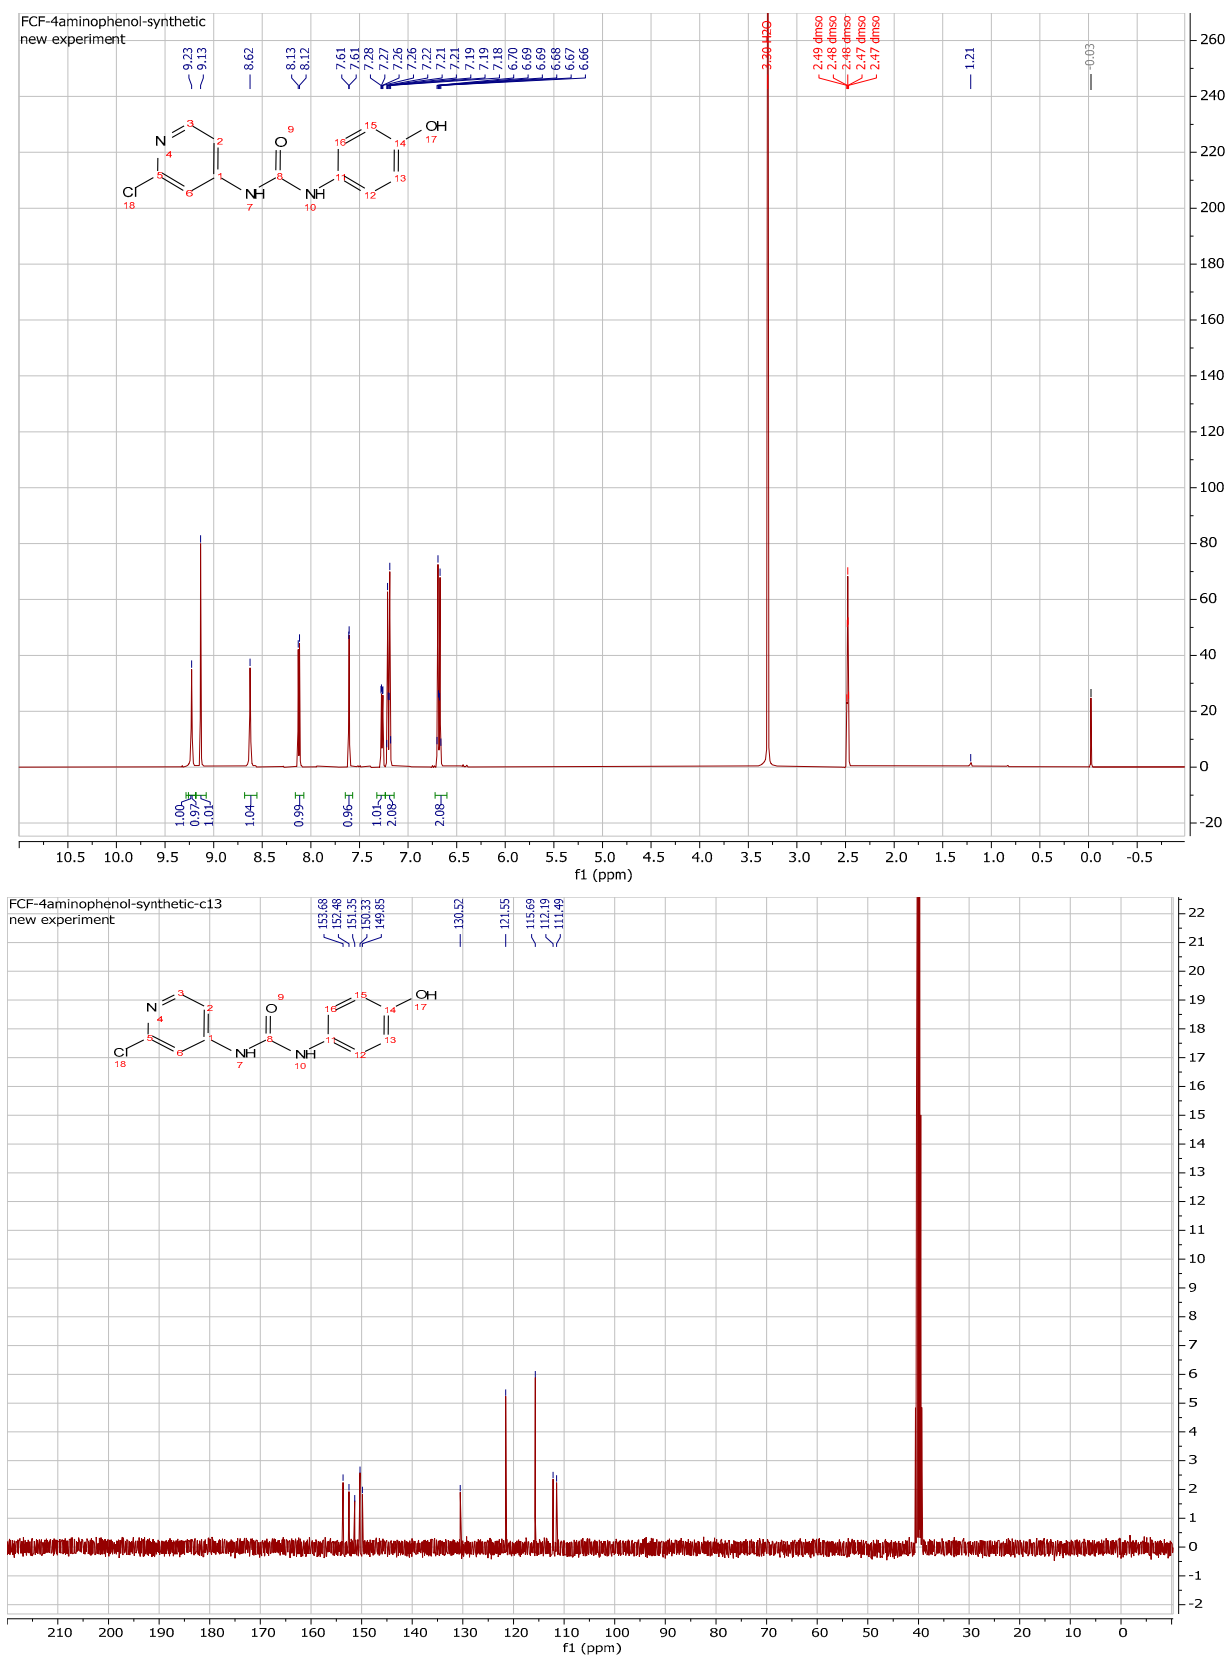

**Figure S5.**  $^1\text{H}$  NMR and  $^{13}\text{C}$  NMR data for the isolated metabolite (4-hydroxyphenyl-forchlorfenuron) found in the optimized biotransformation study.

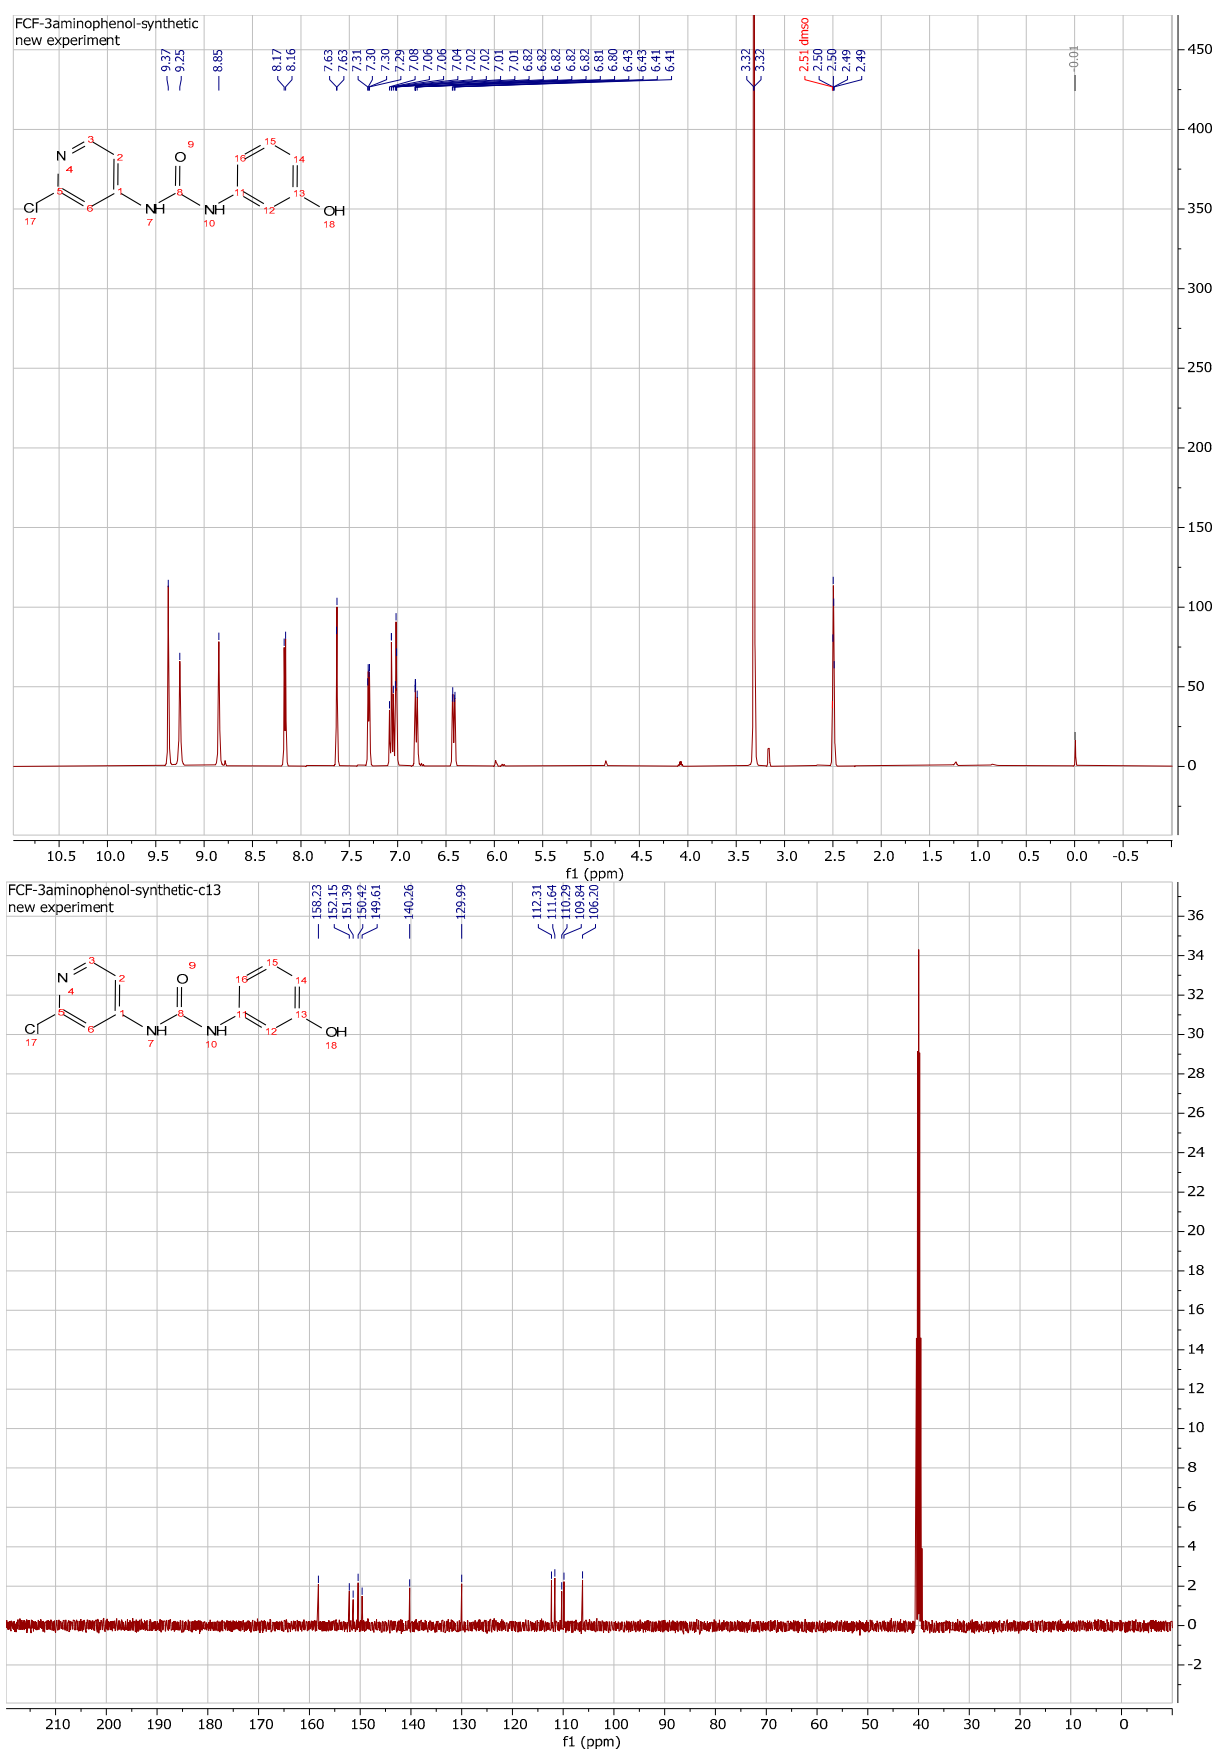

**Figure S6.** <sup>1</sup>H NMR and <sup>13</sup>C NMR data for the synthesized metabolites used as reference standards (4-hydroxyphenyl-forchlorfenuron and 3-hydroxyphenyl-forchlorfenuron).
